# Supplementary material
Source: PubMed Central journal article supplement (PMC2732022)
Supplement: NIHMS55455-supplement-01.pdf [file NIHMS55455-supplement-01.pdf]

## Supplemental Data

### Article

#### The Role of *SPINK1*

#### in *ETS* Rearrangement-Negative Prostate Cancers

Scott A. Tomlins, Daniel R. Rhodes, Jianjun Yu, Sooryanarayana Varambally, Rohit Mehra, Sven Perner, Francesca Demichelis, Beth E. Helgeson, Bharathi Laxman, David S. Morris, Qi Cao, Xuhong Cao, Ove Andrén, Katja Fall, Laura Johnson, John T. Wei, Rajal B. Shah, Hikmat Al-Ahmadie, James A. Eastham, Scott E. Eggen, Samson W. Fine, Kristina Hotakainen, Ulf-Håkan Stenman, Alex Tsodikov, William L. Gerald, Hans Lilja, Victor E. Reuter, Phillip W. Kantoff, Peter T. Scardino, Mark A. Rubin, Anders S. Bjartell, and Arul M. Chinnaiyan

**Table S1. Meta-COPA Analysis of Seven Prostate Cancer Gene Expression Profiling Data Sets in Oncomine.** Genes were ranked by the number of studies in which they scored in the top 100 outliers (ranked by COPA) at any of the three predefined percentile cutoffs (75th, 90th, and 95th). Genes were further ranked by their average COPA rank (Avg. Rank) in studies in which they ranked in the top 100.

| Meta COPA Rank | Gene           | # of Studies | Avg. Rank |
|----------------|----------------|--------------|-----------|
| 1              | <i>ERG</i>     | 7            | 19.3      |
| 2              | <i>SPINK1</i>  | 5            | 29.8      |
| 3              | <i>GPR116</i>  | 5            | 46        |
| 4              | <i>ORM1</i>    | 4            | 10        |
| 5              | <i>ETV1</i>    | 4            | 23        |
| 6              | <i>MYL2</i>    | 4            | 26.8      |
| 7              | <i>NEB</i>     | 4            | 27        |
| 8              | <i>TGM4</i>    | 4            | 30.8      |
| 9              | <i>NELL2</i>   | 4            | 33.5      |
| 10             | <i>KRT13</i>   | 4            | 49        |
| 11             | <i>SLC26A4</i> | 4            | 63.3      |
| 12             | <i>MYL1</i>    | 3            | 8.7       |
| 13             | <i>CXCL13</i>  | 3            | 11        |
| 14             | <i>HCG3</i>    | 3            | 12        |
| 15             | <i>HPGD</i>    | 3            | 20.7      |
| 16             | <i>MIPEP</i>   | 3            | 27.3      |
| 17             | <i>PLAT</i>    | 3            | 31.7      |
| 18             | <i>CST1</i>    | 3            | 32.3      |
| 19             | <i>COL2A1</i>  | 3            | 35.3      |
| 20             | <i>CPS1</i>    | 3            | 36.3      |
| 21             | <i>CRISP3</i>  | 3            | 36.7      |
| 22             | <i>CTAG1A</i>  | 3            | 42.3      |
| 23             | <i>FGB</i>     | 3            | 42.3      |
| 24             | <i>PPFIA2</i>  | 3            | 42.7      |
| 25             | <i>CDH2</i>    | 3            | 44        |
| 26             | <i>PTPRM</i>   | 3            | 45.3      |
| 27             | <i>CYP3A43</i> | 3            | 51.7      |
| 28             | <i>PROM1</i>   | 3            | 53        |
| 29             | <i>HDAC9</i>   | 3            | 61.7      |

**Table S2: Identification of *SPINK1*, *ERG* and *ETV1* outlier samples.** Gene expression data for *SPINK1*, *ERG* and *ETV1* (reporter indicated) for each data set ("[First author name]\_tissue") was downloaded from Oncomine. The total number of benign and cancerous samples are indicated. Expression values were median centered and outlier samples were indicated as described in the **Methods** and **Fig S8**, and the number of benign and cancer outlier samples for each gene is indicated. The number of cancer samples showing exclusive outlier-expression of *SPINK1*, *ERG* and *ETV1* is indicated.

**LaTulippe\_Prostate**

|             | ERG (914_g_at) | ETV1 (37055_at) | SPINK1 (38582_at) | Exclusive |
|-------------|----------------|-----------------|-------------------|-----------|
| Benign (3)  | 0              | 0               | 0                 | NA        |
| Cancer (23) | 6              | 2               | 5                 | 23        |

**Vanaja\_Prostate**

|             | ERG (213541_s_at) | ETV1 (221911_at) | SPINK1 (206239_s_at) | Exclusive |
|-------------|-------------------|------------------|----------------------|-----------|
| Benign (8)  | 0                 | 0                | 1                    | NA        |
| Cancer (27) | 14                | 1                | 4                    | 27        |

**Welsh\_Prostate**

|             | ERG (914_g_at) | ETV1 (37156_at) | SPINK1 (38582_at) | Exclusive |
|-------------|----------------|-----------------|-------------------|-----------|
| Benign (9)  | 0              | 1               | 0                 | NA        |
| Cancer (25) | 11             | 1               | 6                 | 25        |

**Dhanasekaran\_Prostate**

|             | ERG (IMAGE:123755) | ETV1 (no reporter) | SPINK1 (IMAGE:1412481) | Exclusive |
|-------------|--------------------|--------------------|------------------------|-----------|
| Benign (22) | 2                  | NA                 | 0                      | NA        |
| Cancer (56) | 30                 | NA                 | 4                      | 56        |

**Yu\_Prostate**

|             | ERG (914_g_at) | ETV1 (37055_at) | SPINK1 (38582_at) | Exclusive |
|-------------|----------------|-----------------|-------------------|-----------|
| Benign (23) | 0              | 0               | 1                 | NA        |
| Cancer (64) | 24             | 4               | 3                 | 64        |

**Glinsky\_Prostate**

|            | ERG (213541_s_at) | ETV1 (221911_at) | SPINK1 (206239_s_at) | Exclusive |
|------------|-------------------|------------------|----------------------|-----------|
| Benign (0) | 0                 | 0                | 0                    | NA        |
| PCA (79)   | 37                | 8                | 10                   | 78        |

Su\_Multi-cancer

|             | ERG (914_g_at) | ETV1 (37156_at) | SPINK1 (38582_at) | Exclusive |
|-------------|----------------|-----------------|-------------------|-----------|
| Benign (0)  | 0              | 0               | 0                 | NA        |
| Cancer (24) | 11             | 1               | 5                 | 24        |

Bittner\_Multi-cancer (GSE2109)

|             | ERG (213541_s_at) | ETV1 (221911_at) | SPINK1 (206239_s_at) | Exclusive |
|-------------|-------------------|------------------|----------------------|-----------|
| Benign (0)  | 0                 | 0                | 0                    | NA        |
| Cancer (16) | 5                 | 0                | 3                    | 16        |

Yang\_Prostate\*

|             | ERG (213541_s_at) | ETV1 (221911_at) | SPINK1 (206239_s_at) | Exclusive |
|-------------|-------------------|------------------|----------------------|-----------|
| Benign (71) | 5                 | 0                | 2                    | NA        |
| Cancer (62) | 27                | 3                | 16                   | 59        |

\*The Yang\_Prostate data set was downloaded from GEO (GSE8218) and uploaded into a private version of OncoPrint.

**Table S3. Multivariate Cox Proportional-Hazards Regression Analysis for the Association of SPINK1 with Biochemical Recurrence.**

| Glinsky <i>et al.</i> microarray dataset | Recurrence Ratio | 95% CI |       | P     |
|------------------------------------------|------------------|--------|-------|-------|
| SPINK1 (Positive vs. Negative)           | 2.522            | 1.067  | 5.960 | 0.035 |
| Gleason ( $\geq 7$ vs. $< 7$ )           | 2.768            | 0.806  | 9.500 | 0.106 |
| Lymph node (Positive vs. Negative)       | 2.537            | 0.722  | 8.916 | 0.147 |
| Surgical Margin (Positive vs. Negative)  | 2.284            | 0.975  | 5.353 | 0.057 |
| Pre-operative PSA                        | 1.040            | 1.001  | 1.081 | 0.047 |
| Age                                      | 1.042            | 0.979  | 1.108 | 0.194 |

Note: Sample size is 79 with 37 recurrences. Tumor size was missing in the clinical table and thus not included in the model.

| University of Michigan IHC cohort       | Recurrence Ratio | 95% CI |        | P     |
|-----------------------------------------|------------------|--------|--------|-------|
| SPINK1 (Positive vs. Negative)          | 4.099            | 1.431  | 11.741 | 0.009 |
| Gleason ( $\geq 7$ vs. $< 7$ )          | 1.957            | 0.756  | 5.071  | 0.167 |
| Tumor size ( $\geq 2$ cm vs. $< 2$ cm)  | 1.365            | 0.620  | 3.005  | 0.439 |
| Surgical Margin (Positive vs. Negative) | 1.342            | 0.566  | 3.180  | 0.504 |
| Pre-operative PSA                       | 1.050            | 0.986  | 1.118  | 0.127 |
| Age                                     | 1.061            | 1.006  | 1.119  | 0.028 |

Note: Sample size is 75 with 28 recurrences.

| MSKCC IHC cohort                                 | Recurrence Ratio | 95% CI |      | P       |
|--------------------------------------------------|------------------|--------|------|---------|
| SPINK1 (Positive vs. Negative)                   | 2.02             | 1.37   | 2.99 | 0.0004  |
| Pre-operative PSA                                | 1.02             | 1.01   | 1.03 | 0.0002  |
| Seminal Vesical Invasion (Positive vs. Negative) | 3.07             | 2.14   | 4.40 | 1.1E-09 |
| Surgical Margin (Positive vs. Negative)          | 1.57             | 1.15   | 2.14 | 0.004   |
| Lymph Node Involvement (Pos vs. Neg)             | 2.89             | 1.79   | 4.68 | 1.5E-05 |
| Extracapsular Extension (Yes vs. No)             | 1.96             | 1.42   | 2.71 | 4.6E-05 |
| Pathology Gleason ( $\geq 7$ vs. $< 7$ )         | 1.68             | 1.18   | 2.40 | 0.004   |

Note: Sample size is 817 with 200 recurrences.

**Table S4. *SPINK1* outlier status across cohorts.** For the six cohorts evaluated in this study, the total number of prostate cancer samples analyzed, the number and percentage of *SPINK1* positive samples (as defined in the Methods for each assay), and the percentage of samples showing mutually exclusive over-expression of *SPINK1* and *ERG*, *ETV1* or *TMPRSS2-ERG* (if measured). The six cohorts are: the in silico microarray data, quantitative PCR (qPCR) on tissue samples, University of Michigan (UM) immunohistochemistry (IHC) /fluorescence in situ hybridization (FISH), Swedsh Watchful Waiting (SWW) IHC/FISH, Memorial Sloan Kettering Cancer Center (MSKCC) IHC and qPCR on urine samples.

| Cohort        | <b>SPINK1 +</b> | <b>Total</b> | <b>% SPINK1 +</b> | <b>% Exclusive</b> |
|---------------|-----------------|--------------|-------------------|--------------------|
| Microarray    | 56              | 376          | 15%               | 98.9%              |
| qPCR          | 4               | 61           | 7%                | 100%               |
| UM IHC        | 10              | 75           | 13%               | 100%               |
| SWW IHC       | 23              | 312          | 7%                | 100%               |
| MSKCC IHC     | 75              | 823          | 9%                | NA                 |
| Urine         | 11              | 148          | 7%                | NA                 |
| <b>Total:</b> | <b>179</b>      | <b>1795</b>  | <b>10%</b>        | <b>99.7% *</b>     |

\* Individual percentages were averaged

**Table S5. Differentially expressed genes upon siRNA knockdown of *SPINK1* in 22RV1 cells.** 22RV1 cells were transfected with siRNA against *SPINK1* (siRNA *SPINK1*) or non-targeting control siRNA (NT siRNA). Total RNA was isolated and expression profiling was performed using the Agilent Whole Human Genome Oligo Microarray (GPL4133). Hybridizations (siRNA *SPINK1* /NT siRNA) were performed in duplicate with duplicate dye flips. Differentially expressed features (see Methods) are indicated, including the probe name, gene name, representative sequence, and average fold change across the four hybridizations, corrected for the dye flip (siRNA *SPINK1* /NT siRNA). Genes validated by qPCR (see Fig S4) are indicated in blue

| Feature ID | ProbeName    | Gene            | Sequence        | siRNA <i>SPINK1</i> /<br>NT siRNA |
|------------|--------------|-----------------|-----------------|-----------------------------------|
| 36382      | A_24_P119201 | MBD2            | NM_015832       | -5.97                             |
| 25530      | A_23_P214079 | <i>SPINK1</i>   | NM_003122       | -4.60                             |
| 31329      | A_23_P218058 | KLRC4           | NM_013431       | -2.28                             |
| 31695      | A_23_P20068  | <i>GRM3</i>     | NM_000840       | -2.17                             |
| 9794       | A_24_P56484  | <i>BRMS1L</i>   | NM_032352       | -2.08                             |
| 531        | A_23_P77043  | C14orf161       | NM_024764       | -2.07                             |
| 41521      | A_23_P306211 | <i>FAM84A</i>   | NM_145175       | -1.95                             |
| 17730      | A_24_P937405 | <i>PRSS23</i>   | NM_007173       | -1.90                             |
| 44387      | A_23_P150789 | <i>PRSS23</i>   | NM_007173       | -1.85                             |
| 13006      | A_23_P251647 | LOC317671       | NM_173362       | -1.78                             |
| 20835      | A_24_P413920 | <i>FAM84A</i>   | NM_145175       | -1.67                             |
| 4415       | A_23_P145761 | ARL4A           | NM_005738       | -1.62                             |
| 17818      | A_23_P250164 | HGD             | NM_000187       | -1.62                             |
| 12968      | A_24_P220947 | AKR1C1          | NM_001353       | -1.57                             |
| 36945      | A_32_P75581  | BHLHB5          | NM_152414       | 3.33                              |
| 28438      | A_24_P166663 | <i>CDK6</i>     | NM_001259       | 3.30                              |
| 4139       | A_32_P194563 | THC2281660      | THC2281660      | 3.21                              |
| 5000       | A_23_P201628 | LAMC1           | NM_002293       | 3.07                              |
| 2464       | A_23_P116414 | HRASLS3         | NM_007069       | 2.96                              |
| 8126       | A_23_P116235 | MDK             | NM_001012334    | 2.84                              |
| 11956      | A_23_P409386 | SLC25A22        | NM_024698       | 2.63                              |
| 11319      | A_32_P125338 | FAM43B          | NM_207334       | 2.60                              |
| 27988      | A_32_P218707 | THC2314643      | THC2314643      | 2.55                              |
| 25309      | A_23_P416608 | LAMP2           | NM_013995       | 2.53                              |
| 44598      | A_23_P141394 | WIPI1           | NM_017983       | 2.51                              |
| 42489      | A_24_P393811 | TMCO1           | NM_019026       | 2.44                              |
| 6490       | A_23_P209625 | CYP1B1          | NM_000104       | 2.42                              |
| 37302      | A_24_P276583 | TMCO1           | NM_019026       | 2.37                              |
| 23878      | A_23_P371266 | DNM3            | NM_015569       | 2.31                              |
| 43554      | A_23_P52793  | PPP2R1B         | NM_002716       | 2.31                              |
| 18132      | A_23_P130974 | KIAA1683        | NM_025249       | 2.30                              |
| 6090       | A_23_P355067 | TMCO1           | NM_019026       | 2.29                              |
| 36903      | A_24_P323084 | C17orf55        | NM_178519       | 2.27                              |
| 10939      | A_23_P150609 | IGF2            | NM_001007139    | 2.23                              |
| 6181       | A_23_P97990  | <i>HTRA1</i>    | NM_002775       | 2.22                              |
| 11433      | A_23_P138725 | MARVELD1        | NM_031484       | 2.16                              |
| 17892      | A_23_P380318 | EGR4            | NM_001965       | 2.14                              |
| 26152      | A_23_P253561 | C20orf121       | NM_024331       | 2.13                              |
| 9644       | A_24_P270033 | ENST00000278949 | ENST00000278949 | 2.12                              |
| 28209      | A_32_P191262 | <i>ACR</i>      | NM_001097       | 2.09                              |

|       |              |                 |                 |      |
|-------|--------------|-----------------|-----------------|------|
| 43210 | A_24_P390583 | THC2336533      | THC2336533      | 2.08 |
| 42543 | A_23_P164089 | RFFL            | NM_057178       | 2.07 |
| 37592 | A_24_P80204  | MALL            | NM_005434       | 2.05 |
| 43445 | A_23_P112452 | BC045756        | BC045756        | 2.01 |
| 14227 | A_24_P521994 | KLHL24          | NM_017644       | 1.97 |
| 15160 | A_23_P11915  | GDAP2           | NM_017686       | 1.96 |
| 9597  | A_23_P353717 | C16orf75        | NM_152308       | 1.94 |
| 6602  | A_32_P919718 | TMEM105         | NM_178520       | 1.94 |
| 38052 | A_24_P211565 | C1QTNF6         | NM_031910       | 1.94 |
| 39302 | A_23_P168651 | CDK6            | NM_001259       | 1.93 |
| 13321 | A_23_P502797 | WDFY1           | NM_020830       | 1.92 |
| 33557 | A_23_P147185 | CANX            | NM_001746       | 1.91 |
| 38826 | A_23_P100711 | PMP22           | NM_000304       | 1.90 |
| 15973 | A_23_P99540  | ZFP36L1         | NM_004926       | 1.90 |
| 44682 | A_23_P6362   | DERL3           | NM_198440       | 1.87 |
| 11337 | A_23_P107421 | TK1             | NM_003258       | 1.86 |
| 5137  | A_23_P110837 | IRX4            | NM_016358       | 1.85 |
| 34291 | A_23_P90273  | CHST8           | NM_022467       | 1.85 |
| 2773  | A_23_P360804 | CPNE5           | NM_020939       | 1.82 |
| 34687 | A_23_P206724 | MT1E            | NM_175617       | 1.82 |
| 20703 | A_24_P199655 | VANGL1          | NM_138959       | 1.81 |
| 21796 | A_24_P379512 | PIGK            | NM_005482       | 1.81 |
| 34561 | A_23_P434900 | C16orf34        | NM_144570       | 1.81 |
| 43891 | A_32_P216520 | WIF1            | NM_007191       | 1.81 |
| 6827  | A_23_P207131 | MAP3K3          | NM_203351       | 1.80 |
| 23135 | A_23_P111995 | LOXL2           | NM_002318       | 1.80 |
| 17812 | A_23_P211631 | FBLN1           | NM_006486       | 1.79 |
| 18767 | A_23_P52697  | CD248           | NM_020404       | 1.78 |
| 8319  | A_24_P649624 | ENST00000377093 | ENST00000377093 | 1.77 |
| 21189 | A_23_P2554   | KIAA0152        | NM_014730       | 1.76 |
| 19586 | A_24_P592544 | BC107568        | BC107568        | 1.76 |
| 20512 | A_23_P14734  | RPS27L          | NM_015920       | 1.76 |
| 26298 | A_23_P8640   | GPR30           | NM_001505       | 1.75 |
| 708   | A_23_P336513 | GEMIN5          | NM_015465       | 1.74 |
| 560   | A_24_P921260 | AK022030        | AK022030        | 1.74 |
| 9436  | A_23_P10385  | DTL             | NM_016448       | 1.70 |
| 24715 | A_32_P206541 | AK128714        | AK128714        | 1.70 |
| 7603  | A_23_P215431 | POM121          | AB014518        | 1.69 |
| 26526 | A_23_P38894  | FLJ11286        | NM_018381       | 1.69 |
| 37428 | A_32_P201521 | TMEM97          | NM_014573       | 1.69 |
| 9607  | A_23_P162846 | LAMP1           | NM_005561       | 1.69 |
| 20121 | A_23_P10385  | DTL             | NM_016448       | 1.69 |
| 10990 | A_23_P10385  | DTL             | NM_016448       | 1.67 |
| 13501 | A_23_P10385  | DTL             | NM_016448       | 1.67 |
| 25496 | A_32_P104334 | AW972815        | AW972815        | 1.65 |
| 9342  | A_24_P56270  | CR612226        | CR612226        | 1.64 |
| 20136 | A_23_P398637 | RG9MTD2         | NM_152292       | 1.64 |
| 34560 | A_24_P389612 | ENST00000377275 | ENST00000377275 | 1.62 |
| 32009 | A_23_P109122 | RP5-860F19.3    | BC054347        | 1.61 |
| 23338 | A_23_P23924  | CAPN2           | NM_001748       | 1.60 |

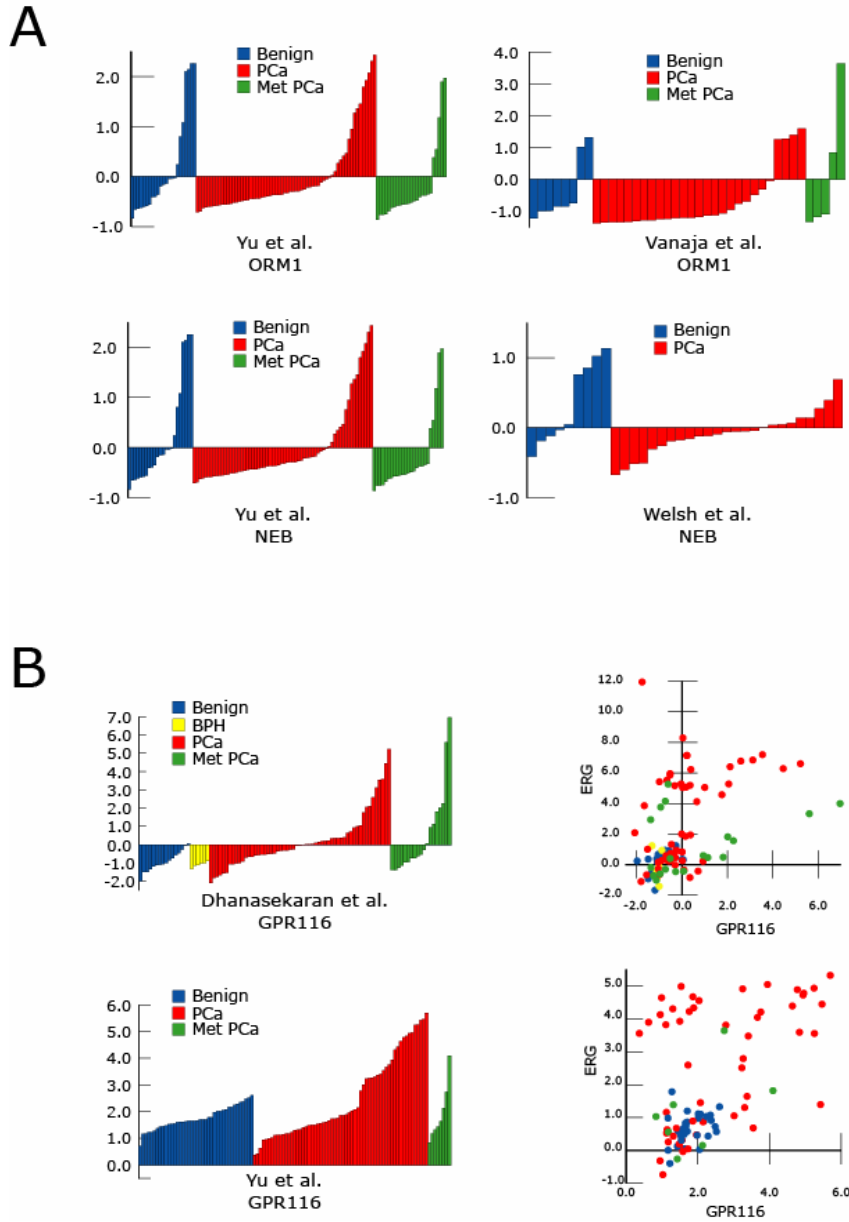

**Figure S1. Meta-Outlier Genes Showing Overexpression in Benign Prostate Tissue and *ETS*-Positive Prostate Cancers**

Meta-outliers, as indicated in Table 1, were analyzed for exclusive overexpression in prostate cancer compared to benign prostate tissue and mutually exclusive overexpression with *ERG* and *ETV1*.

(A) The expression of meta-outlier genes *ORM* (ranked 4<sup>th</sup>) and *NEB* (ranked 7<sup>th</sup>) in normalized expression units are shown from the indicated studies, according to the sample classes described in Figure 1, revealing outlier-expression in multiple benign samples.

(B) The expression of the 3<sup>rd</sup> ranked meta-outlier gene *GPR116* (left panels) and scatter plots of *GPR116* vs. *ERG* (right panels) for all profiled samples in two studies shows co-outlier expression of *GPR116* and *ERG* in multiple samples.



Figure S2

A

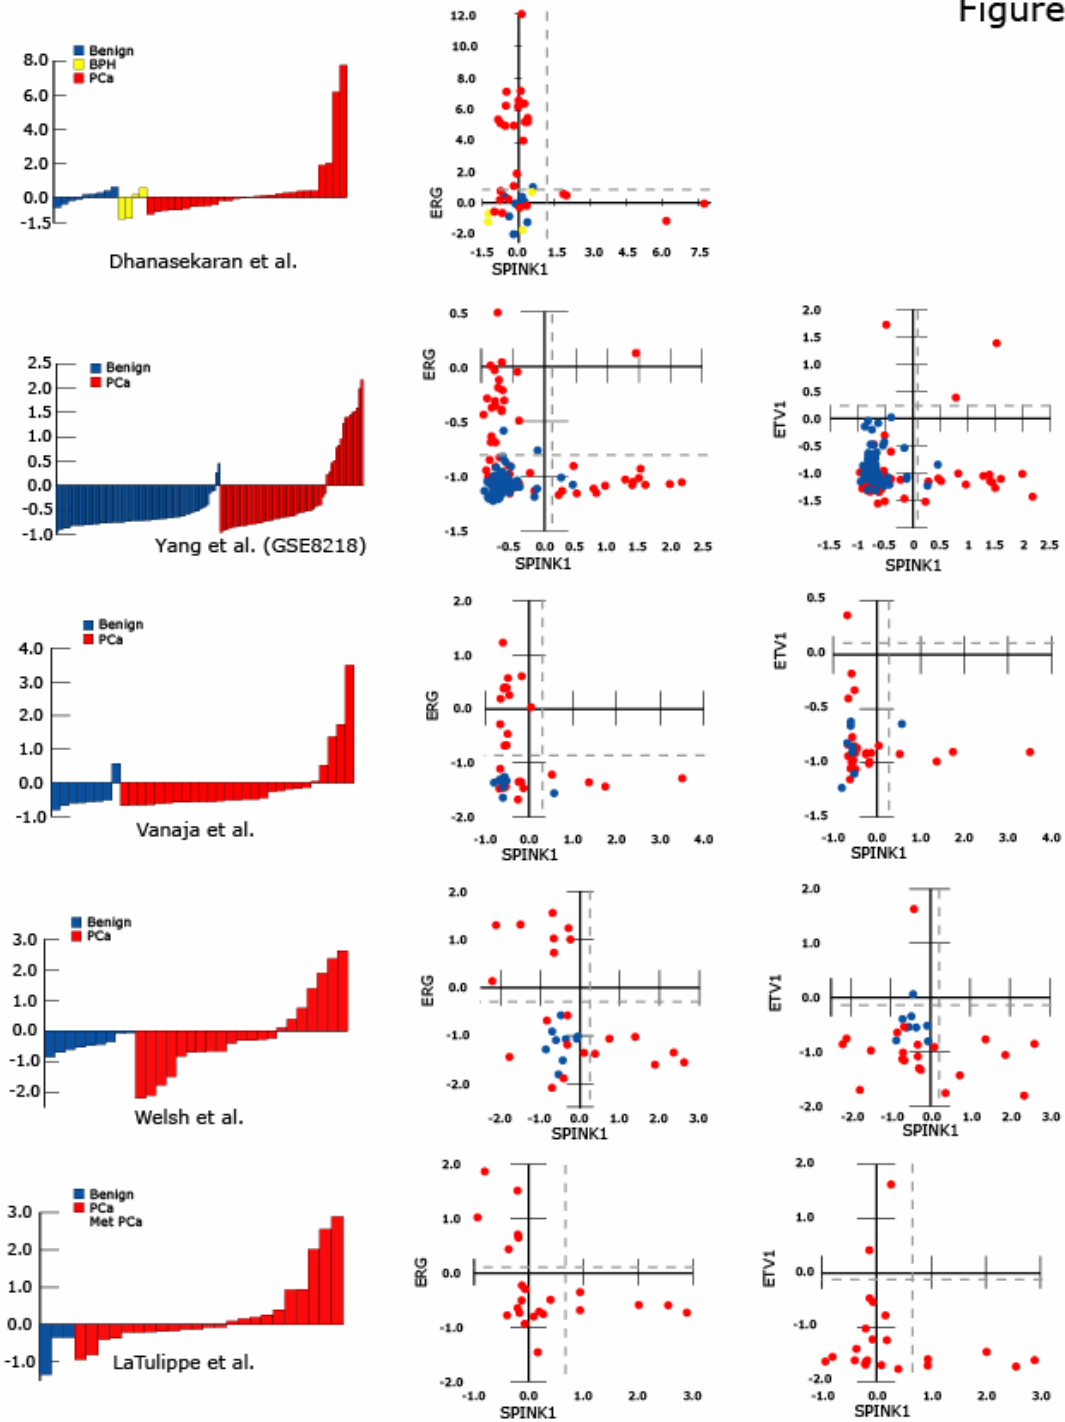

B

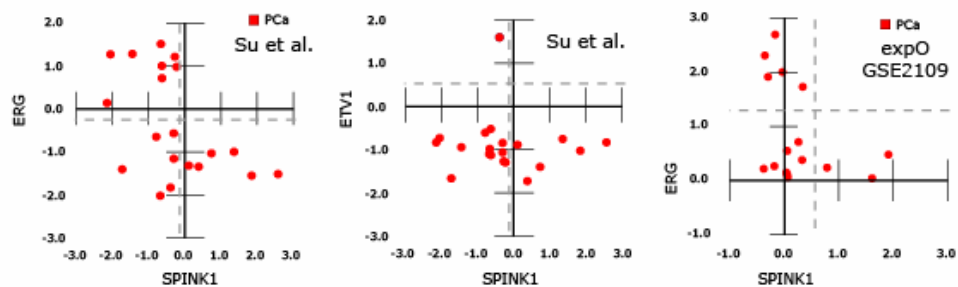

**Figure S2. Overexpression of *SPINK1* in Prostate Cancer Compared to Benign Prostate Tissue and Mutually Exclusive Overexpression with *ERG* and *ETV1* in DNA Microarray Studies**

The expression of *SPINK1* and scatter plots of *SPINK1* vs. *ERG* and *SPINK1* vs. *ETV1* (if measured) for five studies profiling distinct classes of prostate tissue (A) and two studies profiling prostate cancers as part of multi-cancer studies (B) are shown as in Figure 1. Outlier-expression is delineated by the dashed gray lines (See Experimental Procedures). *SPINK1* vs. *ETV1* is not shown for the expO study, as no samples showed *ETV1* overexpression.

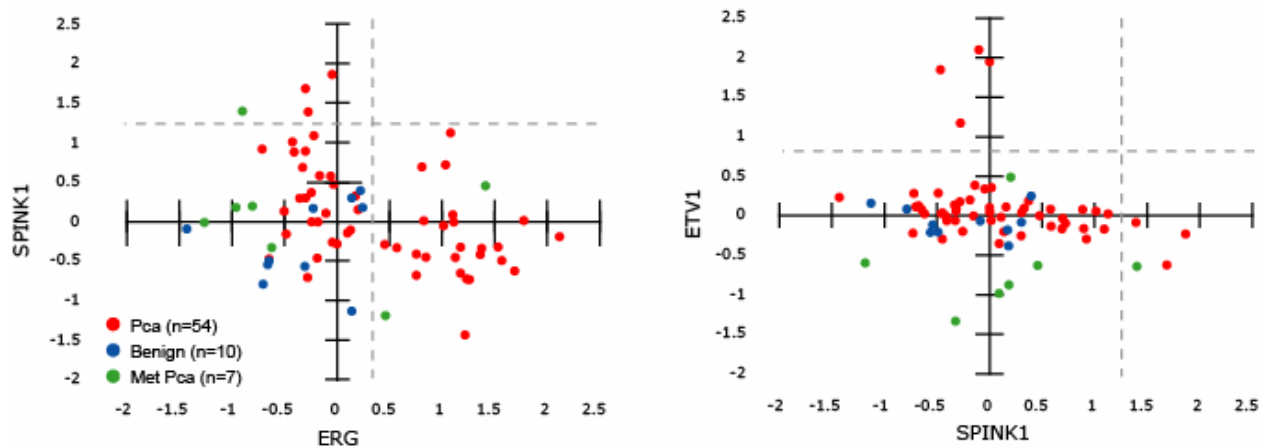

**Figure S3. Overexpression of *SPINK1* in Prostate Cancer Compared to Benign Prostate Tissue and Mutually Exclusive Overexpression with *ERG* and *ETV1***

Scatter plots of *ERG* vs. *SPINK1* (left panel) and *ETV1* vs. *SPINK1* (right panel) by qPCR in 10 benign prostate samples (blue), 54 localized prostate cancers (PCa, red) and 7 metastatic (Met) PCa samples (green). Log of Target gene normalized to the average of HMBS+GAPDH are plotted. Outlier-expression is delineated by the dashed gray lines (See Experimental Procedures).

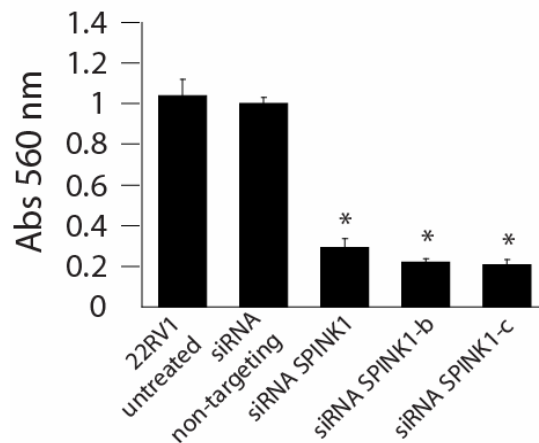

**Figure S4. Knockdown of *SPINK1* in 22RV1 Prostate Cancer Cells Attenuates Invasiveness**

*SPINK1* mediates invasiveness in 22RV1 cells. 22RV1 cells were treated with transfection reagent alone (untreated), or transfected with non-targeting or siRNA against *SPINK1* as in Figure 5, or two additional siRNAs directed against *SPINK1* (SPINK1-b, -c), and cells were assayed for invasion. Mean (n = 3) + SEM are shown, and P values < 0.05 are indicated by asterisks.

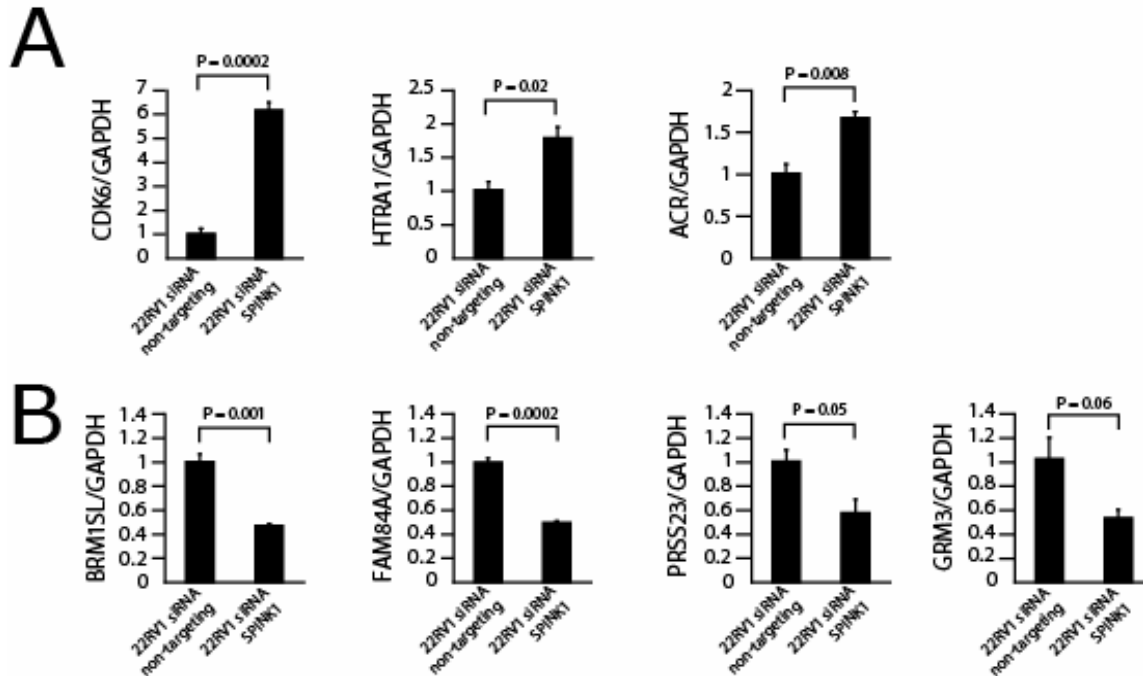

**Figure S5. qPCR Confirmation of Genes Differentially Expressed upon *SPINK1* Knockdown in 22RV1 Cells**

22RV1 cells were transfected with siRNA against *SPINK1* (siRNA siSPINK1) or non-targeting control siRNA (NT siRNA). Total RNA was isolated and expression profiling was performed using the Agilent Whole Human Genome Oligo Microarray (GPL4133). Differentially expressed features are indicated in Table S4. Selected overexpressed (A) and underexpressed (B) genes in 22RV1 siSPINK1 cells were assessed by quantitative PCR as shown. The amount of target gene in each sample was normalized to the amount of *GAPDH*. Mean (n = 3) + SEM are shown, and p values are indicated.

Yu et al.

| R Rank | Gene          | Reporter ID | R    |
|--------|---------------|-------------|------|
| 1      | ATM           | 2000_at     | 0.51 |
| 2      | <b>SPINK1</b> | 38582_at    | 0.51 |
| 3      | CP            | 39008_at    | 0.51 |
| 4      | CASP10        | 1326_at     | 0.39 |
| 5      | PLAT          | 33452_at    | 0.39 |
| 6      | EST           | 33559_at    | 0.39 |
| 7      | DENND4B       | 35786_at    | 0.39 |
| 8      | SERPINI1      | 37259_at    | 0.39 |
| 9      | SCNN1B        | 39682_at    | 0.39 |
| 10     | NOS3          | 576_at      | 0.39 |
| 11     | CPB1          | 41210_at    | 0.39 |
| 12     | CASP10        | 39999_at    | 0.39 |
| 13     | TMEM63A       | 39339_at    | 0.39 |
| 14     | PLCH1         | 38869_at    | 0.39 |
| 15     | RIT1          | 38331_at    | 0.39 |
| 16     | RBBP5         | 36769_at    | 0.39 |
| 17     | TMEM63A       | 35442_at    | 0.39 |
| 18     | EST           | 35906_at    | 0.39 |
| 19     | EIF2B5        | 34758_at    | 0.39 |
| 20     | HIST1H4B      | 33049_at    | 0.38 |
| 21     | SMA5          | 41643_at    | 0.38 |
| 22     | GUSBP1        | 41642_at    | 0.38 |
| 23     | PTPRT         | 39227_at    | 0.38 |
| 24     | EST           | 37956_at    | 0.38 |
| 25     | IRF7          | 36412_s at  | 0.38 |

Welsh et al.

| R Rank | Gene          | Reporter ID | R    |
|--------|---------------|-------------|------|
| 1      | HPGD          | 32570_at    | 0.67 |
| 2      | HPGD          | 37322_s_at  | 0.67 |
| 3      | <b>SPINK1</b> | 38582_at    | 0.67 |
| 4      | HPGD          | 37323_r_at  | 0.67 |
| 5      | PRIM2A        | 122_at      | 0.50 |
| 6      | FUT3          | 38495_s_at  | 0.50 |
| 7      | EEF1A2        | 35174_i_at  | 0.50 |
| 8      | PRIM2A        | 36898_r_at  | 0.50 |
| 9      | PAH           | 33701_at    | 0.40 |
| 10     | NPR3          | 34519_at    | 0.40 |
| 11     | UGT2B4        | 37058_at    | 0.40 |

LaTulippe et al.

| R Rank | Gene          | Reporter ID | R    |
|--------|---------------|-------------|------|
| 1      | EST           | 33566_at    | 0.56 |
| 2      | <b>SPINK1</b> | 38582_at    | 0.56 |
| 3      | FABP5         | 39799_at    | 0.56 |
| 4      | HPGD          | 32570_at    | 0.42 |
| 5      | NUP210        | 41813_at    | 0.42 |
| 6      | HPGD          | 37322_s_at  | 0.42 |
| 7      | EST           | 1525_s_at   | 0.33 |
| 8      | EST           | 32413_at    | 0.33 |
| 9      | BCKDHB        | 41683_i_at  | 0.33 |
| 10     | AAK1          | 40572_at    | 0.33 |

Glinsky et al.

| R Rank | Gene          | Reporter ID | R    |
|--------|---------------|-------------|------|
| 1      | UGT1A6        | 204532_x_at | 0.72 |
| 2      | UGT1A6        | 206094_x_at | 0.72 |
| 3      | <b>SPINK1</b> | 206239_s_at | 0.72 |
| 4      | UGT1A6        | 208596_s_at | 0.72 |
| 5      | UGT1A6        | 215125_s_at | 0.72 |
| 6      | UGT1A6        | 207126_x_at | 0.72 |
| 7      | F2RL1         | 206429_at   | 0.56 |
| 8      | EST           | 213506_at   | 0.56 |
| 9      | C5            | 205500_at   | 0.42 |
| 10     | FANCF         | 205848_at   | 0.38 |
| 11     | UGT2B4        | 206505_at   | 0.38 |
| 12     | PPM1E         | 205938_at   | 0.38 |
| 13     | LIMS1         | 207198_s_at | 0.32 |
| 14     | LIMS1         | 212687_at   | 0.32 |
| 15     | ACSL5         | 218322_s_at | 0.32 |
| 16     | DNMBP         | 212838_at   | 0.32 |

Vanaja et al.

| R Rank | Gene          | Reporter ID | R    |
|--------|---------------|-------------|------|
| 1      | <b>SPINK1</b> | 206239_s_at | 0.52 |
| 2      | TBC1D10C      | 228258_at   | 0.52 |
| 3      | LY6K          | 223687_s_at | 0.39 |
| 4      | ITGB6         | 226535_at   | 0.39 |
| 5      | SH3BGRL       | 201312_s_at | 0.29 |
| 6      | YIPF6         | 212341_at   | 0.29 |
| 7      | EME1          | 234464_s_at | 0.29 |
| 8      | SEC22C        | 236268_at   | 0.29 |

**Figure S6. Identification of Genes Showing Coexpression with *SPINK1* across Multiple Prostate Cancer Profiling Studies**

Genes showing coexpression with *SPINK1* ( $R > 0.5$ ) from the prostate cancer profiling studies included in the Meta-COPA analysis. *SPINK1* was queried in the OncoPrint database using the coexpression module. For each study, all genes showing  $R > 0.3$  are listed, along with the corresponding feature identification. *SPINK1* is indicated in red. Genes showing  $R > 0.3$  in multiple studies are indicated in blue.

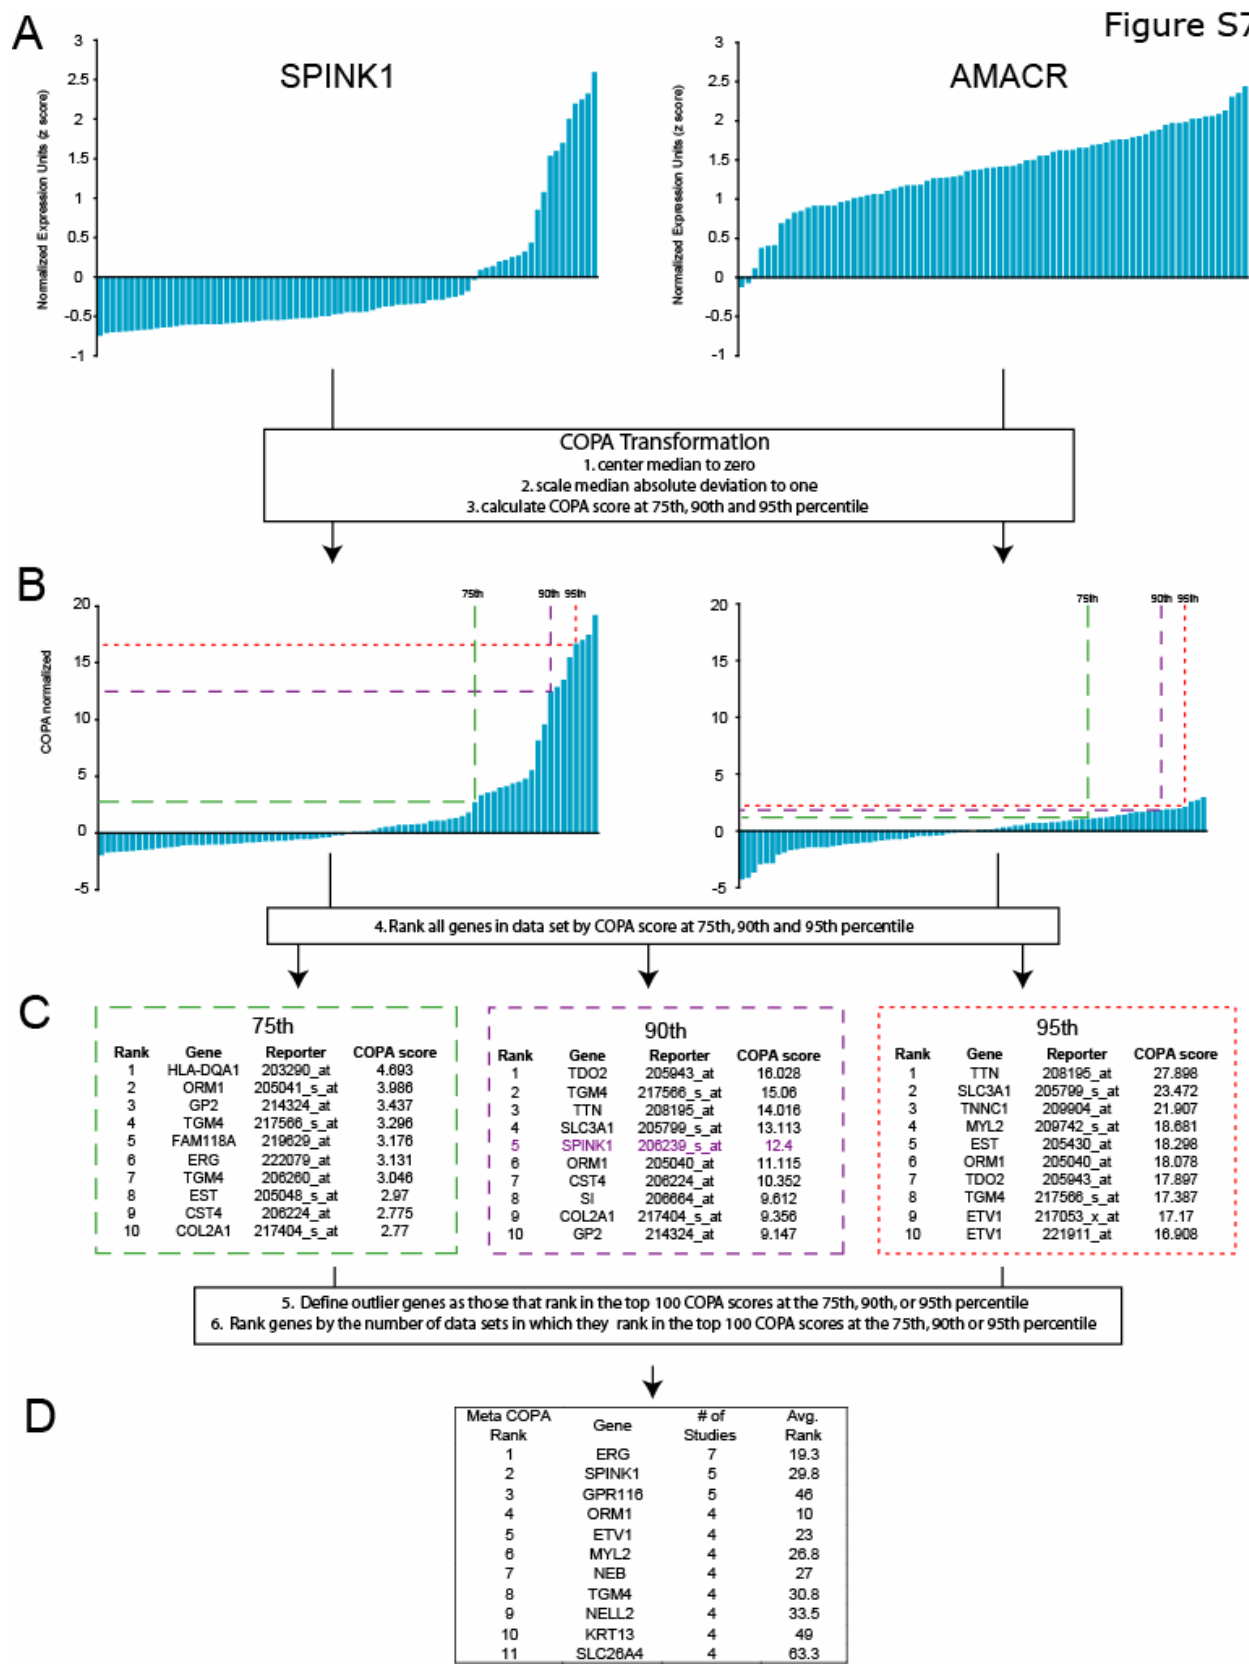

### Figure S7. Meta-Outlier Analysis Summary

COPA analysis was performed on 7 prostate cancer gene expression data sets in OncoPrint 3.0 (www.oncoPrint.org).

(A) First, for each data set considering all samples, gene expression values (in OncoPrint normalized expression units) are median-centered per gene, setting each gene's median expression value to zero. Each bar in the figure represents an individual sample. Second, the median absolute deviation (MAD) is calculated per gene and scaled to 1 by dividing each gene expression value by its MAD. Of note, median and MAD are used for transformation as opposed to mean and standard deviation so that outlier expression values do not unduly influence the distribution estimates, and are thus preserved post-normalization.

(B) Third, for each gene in each data set, COPA scores are computed as the 75<sup>th</sup>, 90<sup>th</sup> and 95<sup>th</sup> percentile of the transformed gene expression values. Thus, each gene in each data set has 3 COPA scores, one at each percentile value, representing the degree of overexpression in decreasing subsets of cases. The expression of *SPINK1* (outlier profile) and *AMACR* (typical biomarker profile) from the Glinsky *et al.* study are shown in the left and right panels, respectively.

(C) Fourth, in each data set, all genes are rank-ordered by the 3 COPA scores, generating 3 rank-ordered lists of genes per data set.

(D) Fifth, for each data set, we defined outlier genes as those that ranked in the top 100 COPA scores in any one of the 3 rank-ordered lists. Sixth, to identify "meta-outlier" genes, we ranked genes by the number of data sets where the gene was identified as an outlier gene. Genes identified as outliers in the same number of studies were further ranked by their average outlier rank across those studies.

Figure S8

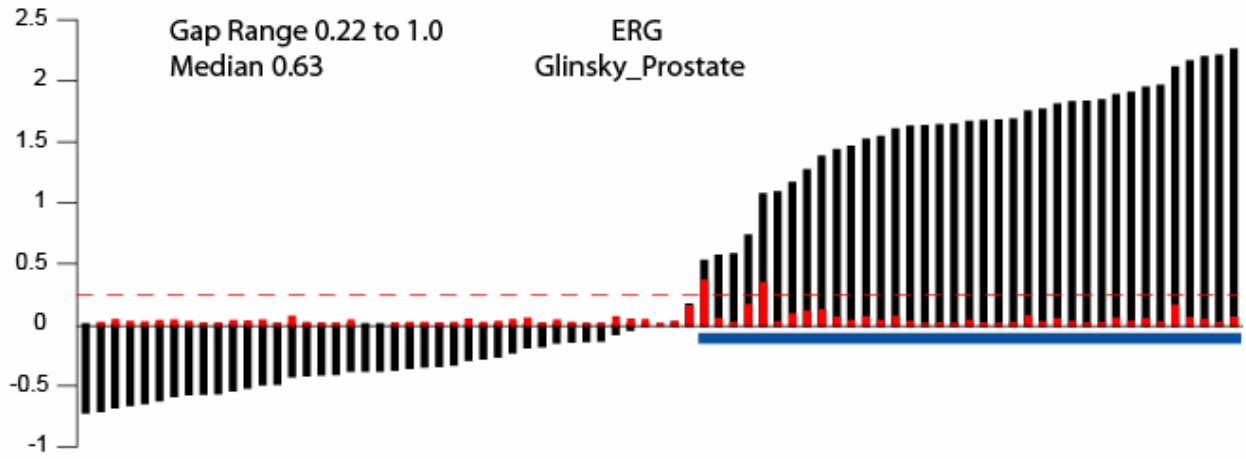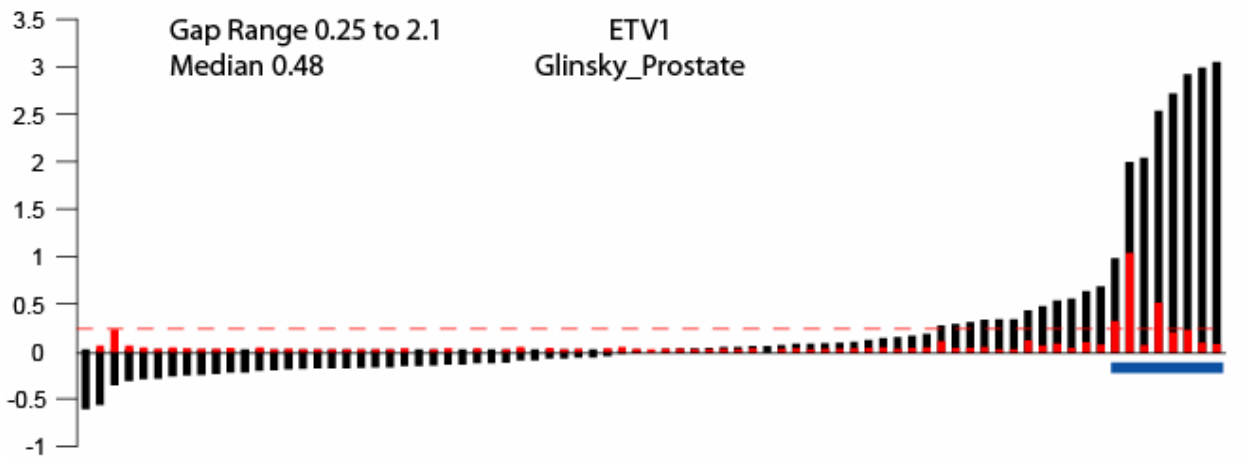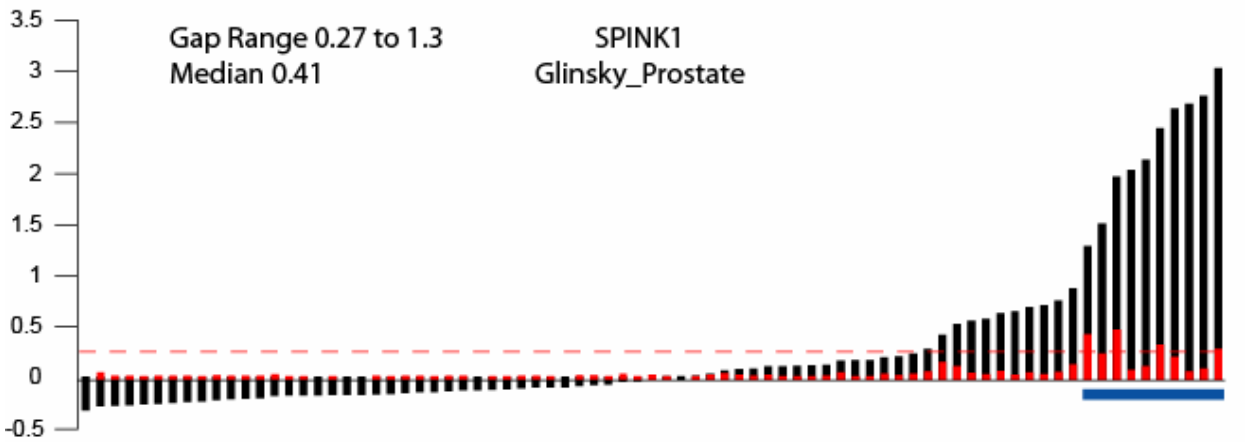



### Figure S8. Identification of Samples Showing Outlier Expression

To identify individual samples showing outlier-expression in each microarray data set, we used a two step process to recreate the visual identification of the natural “gap” between non-outlier and outlier samples. First, gene expression values for all prostate samples in the data set (excluding metastatic prostate cancer) were median centered. Next, all samples were rank ordered in ascending order and the difference between each rank ordered sample and the preceding sample was calculated. The difference, or gap, between visually identified non-outlier and outlier populations in all studies for *ERG* ranged from 0.22 to 1.0 (median 0.63). Hence, we defined the first sample with a positive median centered value and greater than 0.22 normalized expression unit gap compared to the preceding sample as the transition to samples with outlier expression. Similar gaps were observed for *ETV1* and *SPINK1* gene expression values and the same criteria (positive median centered value and greater than 0.22 unit gap) was used to define the outlier population. Median centered expression values (in normalized expression units, z-scores) for *SPINK1*, *ETV1* and *ERG* from the “Glinsky\_prostate” data set are plotted in black. The difference between each sample and the preceding sample are plotted in red. The 0.22 gap threshold is shown in the dashed red line. Outlier populations defined by this method are indicated in blue. Range and Median gap values for each gene in all data sets is given. No gap > 0.22 units was identified for *ETV1* in the GSE2109 data set.
